# Supplementary material
Source: HighWire-hosted journal article supplement (https://erj.ersjournals.com/content/54/2/1901440)
Supplement: inline-supplementary-material-1 [file inline-supplementary-material-1.pdf]

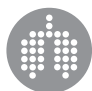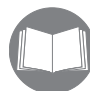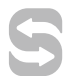

SHAREABLE PDF

# Re-visiting the HLA dogma

Antoine Roux<sup>1,2</sup> and Stijn E. Verleden<sup>3</sup>

**Affiliations:** <sup>1</sup>Pneumology, Adult Cystic Fibrosis Center and Lung Transplantation Dept, Foch Hospital, Suresnes, France. <sup>2</sup>Université Versailles-Saint-Quentin-en-Yvelines, Versailles, France. <sup>3</sup>Leuven Lung Transplant Group, Dept of Chronic Diseases, Metabolism and Ageing (CHROMETA), KU Leuven, Leuven, Belgium.

**Correspondence:** Antoine Roux, Pneumology, Adult Cystic Fibrosis Center and Lung Transplantation Dept, Foch Hospital, 40 rue Worth, Suresnes, France. E-mail: a.roux@hopital-foch.org

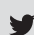

@ERSpublications

HLA-G may be protective in solid organ transplantation <http://bit.ly/2ZjnPFy>

**Cite this article as:** Roux A, Verleden SE. Re-visiting the HLA dogma. *Eur Respir J* 2019; 54: 1901440 [<https://doi.org/10.1183/13993003.01440-2019>].

This single-page version can be shared freely online.

Unravelling the intricacies of the human leukocyte antigen (HLA) system has been fundamental to our understanding of the immunobiological discrimination of self from non-self. In the context of solid organ transplantation, the allo-immune response is predominantly driven by a varying but inevitable degree of HLA mismatch (classically HLA class I and II molecules) between donor organs and the recipient host. In general, donor-recipient HLA mismatching tends to be maximal for solid organs where prospective HLA matching is not possible due to logistic reasons. This is true for lung transplantation, although rapid screening cellular and antigenic assays at the time of transplantation and thereafter can help detect, mitigate and manage the risks associated with donor-specific antibody production in the recipient. More recently, the newly developed epitope analysis is a significant step forward for ever finer precision deciphering of immunogenic mismatch-driven donor-specific HLA antibody production (DSA) [1] and graft and recipient outcomes [2].
